# Supplementary material
Source: Springer Nature journal article supplement (https://www.springermedizin.de/resource/supplementary/13058_2009_2430_MOESM7_ESM.pdf/9701392)

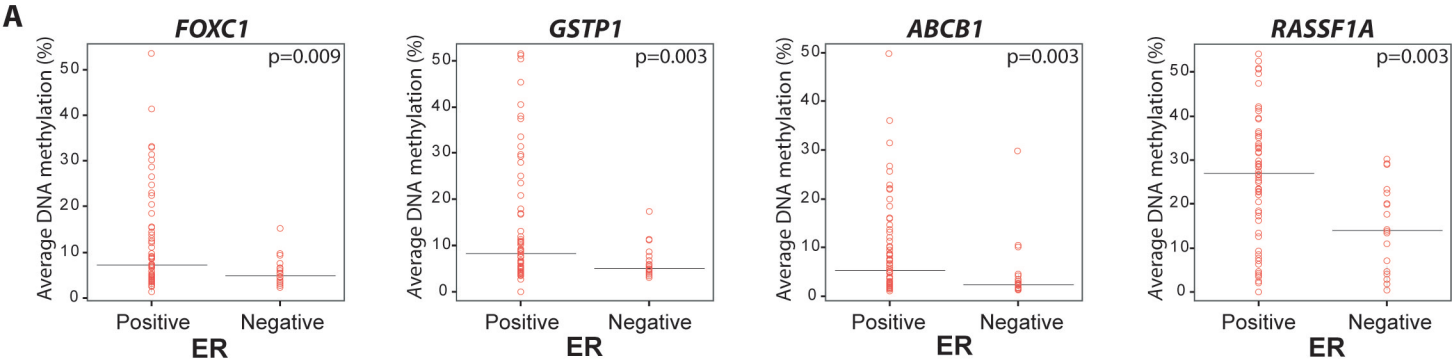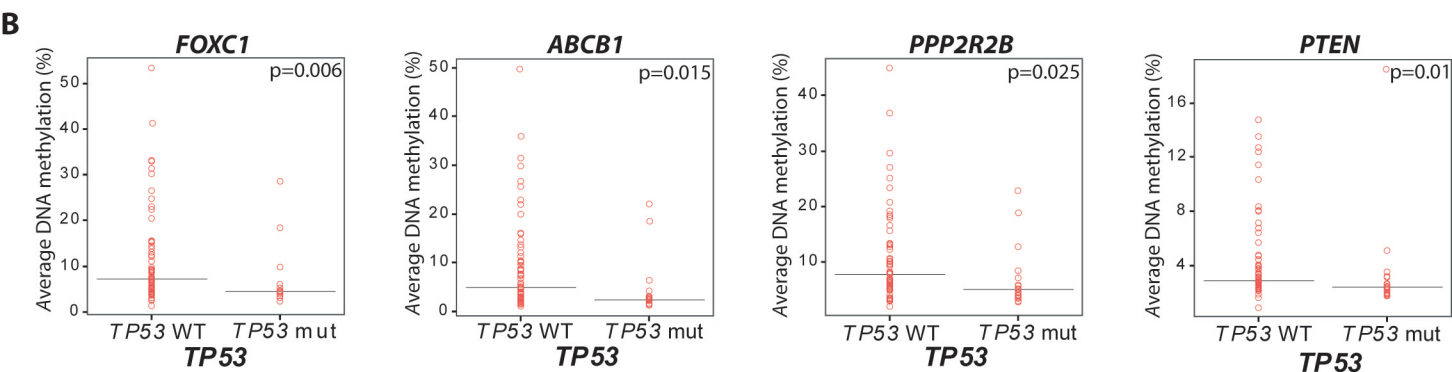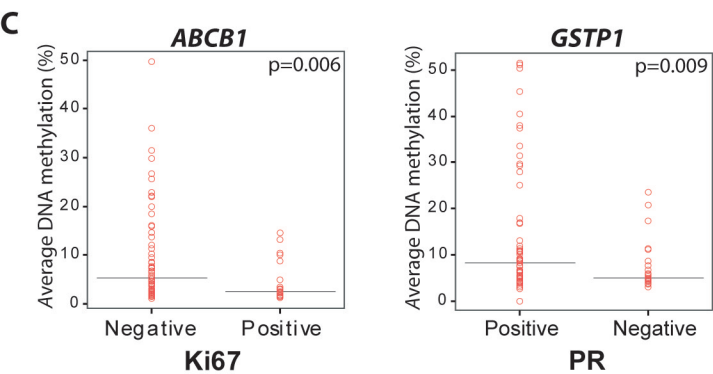

Supplement: MOESM7 [file 9701392]
